# Supplementary material
Source: publisher figshare collection journal article supplement (https://acs.figshare.com/ndownloader/files/5217043)
Supplement: Supplementary file 1 [file 5217043]

 
data_cubitemm 
 
_audit_creation_method            SHELXL-97 
_chemical_name_systematic 
; 
 ? 
; 
_chemical_name_common             ? 
_chemical_melting_point           ? 
_chemical_formula_moiety          ? 
_chemical_formula_sum 
 'Bi Cu P2 Se6' 
_chemical_formula_weight          808.22 
 
loop_ 
 _atom_type_symbol 
 _atom_type_description 
 _atom_type_scat_dispersion_real 
 _atom_type_scat_dispersion_imag 
 _atom_type_scat_source 
 'P'  'P'   0.1023   0.0942 
 'International Tables Vol C Tables 4.2.6.8 and 6.1.1.4' 
 'Cu'  'Cu'   0.3201   1.2651 
 'International Tables Vol C Tables 4.2.6.8 and 6.1.1.4' 
 'Se'  'Se'  -0.0929   2.2259 
 'International Tables Vol C Tables 4.2.6.8 and 6.1.1.4' 
 'Bi'  'Bi'  -4.1077  10.2566 
 'International Tables Vol C Tables 4.2.6.8 and 6.1.1.4' 
 
_symmetry_cell_setting            ? 
_symmetry_space_group_name_H-M    ? 
 
loop_ 
 _symmetry_equiv_pos_as_xyz 
 'x, y, z' 
 '-y, x-y, z' 
 '-x+y, -x, z' 
 'x+2/3, y+1/3, z+1/3' 
 '-y+2/3, x-y+1/3, z+1/3' 
 '-x+y+2/3, -x+1/3, z+1/3' 
 'x+1/3, y+2/3, z+2/3' 
 '-y+1/3, x-y+2/3, z+2/3' 
 '-x+y+1/3, -x+2/3, z+2/3' 
 '-x, -y, -z' 
 'y, -x+y, -z' 
 'x-y, x, -z' 
 '-x+2/3, -y+1/3, -z+1/3' 
 'y+2/3, -x+y+1/3, -z+1/3' 
 'x-y+2/3, x+1/3, -z+1/3' 
 '-x+1/3, -y+2/3, -z+2/3' 
 'y+1/3, -x+y+2/3, -z+2/3' 
 'x-y+1/3, x+2/3, -z+2/3' 
 
_cell_length_a                    6.5532(16) 
_cell_length_b                    6.5532(16) 
_cell_length_c                    39.762(13) 
_cell_angle_alpha                 90.00 
_cell_angle_beta                  90.00 
_cell_angle_gamma                 120.00 
_cell_volume                      1478.8(7) 
_cell_formula_units_Z             6 
_cell_measurement_temperature     293(2) 
_cell_measurement_reflns_used     ? 
_cell_measurement_theta_min       ? 
_cell_measurement_theta_max       ? 
 
_exptl_crystal_description        ? 
_exptl_crystal_colour             ? 
_exptl_crystal_size_max           ? 
_exptl_crystal_size_mid           ? 
_exptl_crystal_size_min           ? 
_exptl_crystal_density_meas       ? 
_exptl_crystal_density_diffrn     5.445 
_exptl_crystal_density_method     'not measured' 
_exptl_crystal_F_000              2076 
_exptl_absorpt_coefficient_mu     42.383 
_exptl_absorpt_correction_type    ? 
_exptl_absorpt_correction_T_min   ? 
_exptl_absorpt_correction_T_max   ? 
_exptl_absorpt_process_details    ? 
 
_exptl_special_details 
; 
 ? 
; 
 
_diffrn_ambient_temperature       293(2) 
_diffrn_radiation_wavelength      0.71073 
_diffrn_radiation_type            MoK\a 
_diffrn_radiation_source          'fine-focus sealed tube' 
_diffrn_radiation_monochromator   graphite 
_diffrn_measurement_device_type   ? 
_diffrn_measurement_method        ? 
_diffrn_detector_area_resol_mean  ? 
_diffrn_standards_number          ? 
_diffrn_standards_interval_count  ? 
_diffrn_standards_interval_time   ? 
_diffrn_standards_decay_%         ? 
_diffrn_reflns_number             2947 
_diffrn_reflns_av_R_equivalents   0.0584 
_diffrn_reflns_av_sigmaI/netI     0.0371 
_diffrn_reflns_limit_h_min        -8 
_diffrn_reflns_limit_h_max        7 
_diffrn_reflns_limit_k_min        -6 
_diffrn_reflns_limit_k_max        8 
_diffrn_reflns_limit_l_min        -51 
_diffrn_reflns_limit_l_max        49 
_diffrn_reflns_theta_min          1.54 
_diffrn_reflns_theta_max          28.26 
_reflns_number_total              799 
_reflns_number_gt                 767 
_reflns_threshold_expression      >2sigma(I) 
 
_computing_data_collection        ? 
_computing_cell_refinement        ? 
_computing_data_reduction         ? 
_computing_structure_solution     'SHELXS-97 (Sheldrick, 1990)' 
_computing_structure_refinement   'SHELXL-97 (Sheldrick, 1997)' 
_computing_molecular_graphics     ? 
_computing_publication_material   ? 
 
_refine_special_details 
; 
 Refinement of F^2^ against ALL reflections.  The weighted R-factor wR and 
 goodness of fit S are based on F^2^, conventional R-factors R are based 
 on F, with F set to zero for negative F^2^. The threshold expression of 
 F^2^ > 2sigma(F^2^) is used only for calculating R-factors(gt) etc. and is 
 not relevant to the choice of reflections for refinement.  R-factors based 
 on F^2^ are statistically about twice as large as those based on F, and R- 
 factors based on ALL data will be even larger. 
; 
 
_refine_ls_structure_factor_coef  Fsqd  
_refine_ls_matrix_type            full 
_refine_ls_weighting_scheme       calc  
_refine_ls_weighting_details 
 'calc w=1/[\s^2^(Fo^2^)+(0.0457P)^2^+188.9817P] where P=(Fo^2^+2Fc^2^)/3' 
_atom_sites_solution_primary      direct 
_atom_sites_solution_secondary    difmap 
_atom_sites_solution_hydrogens    geom 
_refine_ls_hydrogen_treatment     mixed 
_refine_ls_extinction_method      SHELXL 
_refine_ls_extinction_coef        0.00008(4) 
_refine_ls_extinction_expression 
 'Fc^*^=kFc[1+0.001xFc^2^\l^3^/sin(2\q)]^-1/4^' 
_refine_ls_number_reflns          799 
_refine_ls_number_parameters      35 
_refine_ls_number_restraints      0 
_refine_ls_R_factor_all           0.0504 
_refine_ls_R_factor_gt            0.0481 
_refine_ls_wR_factor_ref          0.1168 
_refine_ls_wR_factor_gt           0.1160 
_refine_ls_goodness_of_fit_ref    1.199 
_refine_ls_restrained_S_all       1.199 
_refine_ls_shift/su_max           0.000 
_refine_ls_shift/su_mean          0.000 
 
loop_ 
 _atom_site_label 
 _atom_site_type_symbol 
 _atom_site_fract_x 
 _atom_site_fract_y 
 _atom_site_fract_z 
 _atom_site_U_iso_or_equiv 
 _atom_site_adp_type 
 _atom_site_occupancy 
 _atom_site_symmetry_multiplicity 
 _atom_site_calc_flag 
 _atom_site_refinement_flags 
 _atom_site_disorder_assembly 
 _atom_site_disorder_group 
Cu1 Cu 0.3333 0.6667 0.05347(11) 0.0129(7) Uani 0.85 3 d SP . . 
Cu2 Cu 0.3333 0.6667 0.0761(13) 0.047(9) Uani 0.15 3 d SP . . 
Se1 Se 0.3761(2) 0.3877(2) 0.12733(3) 0.0119(3) Uani 1 1 d . . . 
Se2 Se 0.33886(19) 1.0230(2) 0.03856(3) 0.0086(3) Uani 1 1 d . . . 
Bi Bi 0.0000 0.0000 0.09073(2) 0.0099(3) Uani 1 3 d S . . 
P1 P 0.6667 0.3333 0.11276(13) 0.0092(10) Uani 1 3 d S . . 
P2 P 0.6667 1.3333 0.05610(13) 0.0074(9) Uani 1 3 d S . . 
 
loop_ 
 _atom_site_aniso_label 
 _atom_site_aniso_U_11 
 _atom_site_aniso_U_22 
 _atom_site_aniso_U_33 
 _atom_site_aniso_U_23 
 _atom_site_aniso_U_13 
 _atom_site_aniso_U_12 
Cu1 0.0075(10) 0.0075(10) 0.0238(18) 0.000 0.000 0.0037(5) 
Cu2 0.014(8) 0.014(8) 0.11(3) 0.000 0.000 0.007(4) 
Se1 0.0112(6) 0.0142(6) 0.0112(6) -0.0048(4) -0.0002(4) 0.0069(5) 
Se2 0.0074(5) 0.0076(5) 0.0085(6) -0.0017(4) -0.0001(4) 0.0020(4) 
Bi 0.0086(3) 0.0086(3) 0.0127(4) 0.000 0.000 0.00428(15) 
P1 0.0096(14) 0.0096(14) 0.008(2) 0.000 0.000 0.0048(7) 
P2 0.0071(14) 0.0071(14) 0.008(2) 0.000 0.000 0.0036(7) 
 
_geom_special_details 
; 
 All esds (except the esd in the dihedral angle between two l.s. planes) 
 are estimated using the full covariance matrix.  The cell esds are taken 
 into account individually in the estimation of esds in distances, angles 
 and torsion angles; correlations between esds in cell parameters are only 
 used when they are defined by crystal symmetry.  An approximate (isotropic) 
 treatment of cell esds is used for estimating esds involving l.s. planes. 
; 
 
loop_ 
 _geom_bond_atom_site_label_1 
 _geom_bond_atom_site_label_2 
 _geom_bond_distance 
 _geom_bond_site_symmetry_2 
 _geom_bond_publ_flag 
Cu1 Cu2 0.90(5) . ? 
Cu1 Se2 2.3917(17) 2_665 ? 
Cu1 Se2 2.3917(17) . ? 
Cu1 Se2 2.3917(17) 3_565 ? 
Cu2 Se2 2.76(3) 2_665 ? 
Cu2 Se2 2.76(3) . ? 
Cu2 Se2 2.76(3) 3_565 ? 
Cu2 Se1 2.84(4) . ? 
Cu2 Se1 2.84(4) 2_665 ? 
Cu2 Se1 2.84(4) 3_565 ? 
Se1 P1 2.1830(19) . ? 
Se1 Bi 2.8958(14) . ? 
Se2 P2 2.206(2) . ? 
Se2 Bi 2.9871(14) 1_565 ? 
Bi Se1 2.8958(14) 2 ? 
Bi Se1 2.8958(14) 3 ? 
Bi Se2 2.9872(14) 2_665 ? 
Bi Se2 2.9872(14) 3_455 ? 
Bi Se2 2.9872(14) 1_545 ? 
P1 Se1 2.1830(19) 3_665 ? 
P1 Se1 2.1830(19) 2_655 ? 
P1 P2 2.253(8) 1_545 ? 
P2 Se2 2.206(2) 3_575 ? 
P2 Se2 2.206(2) 2_775 ? 
P2 P1 2.253(8) 1_565 ? 
 
loop_ 
 _geom_angle_atom_site_label_1 
 _geom_angle_atom_site_label_2 
 _geom_angle_atom_site_label_3 
 _geom_angle 
 _geom_angle_site_symmetry_1 
 _geom_angle_site_symmetry_3 
 _geom_angle_publ_flag 
Cu2 Cu1 Se2 104.36(11) . 2_665 ? 
Cu2 Cu1 Se2 104.36(10) . . ? 
Se2 Cu1 Se2 114.07(8) 2_665 . ? 
Cu2 Cu1 Se2 104.36(10) . 3_565 ? 
Se2 Cu1 Se2 114.07(8) 2_665 3_565 ? 
Se2 Cu1 Se2 114.07(8) . 3_565 ? 
Cu1 Cu2 Se2 57.2(9) . 2_665 ? 
Cu1 Cu2 Se2 57.2(9) . . ? 
Se2 Cu2 Se2 93.5(12) 2_665 . ? 
Cu1 Cu2 Se2 57.2(9) . 3_565 ? 
Se2 Cu2 Se2 93.5(12) 2_665 3_565 ? 
Se2 Cu2 Se2 93.5(12) . 3_565 ? 
Cu1 Cu2 Se1 135.8(7) . . ? 
Se2 Cu2 Se1 99.6(2) 2_665 . ? 
Se2 Cu2 Se1 165.7(15) . . ? 
Se2 Cu2 Se1 91.6(2) 3_565 . ? 
Cu1 Cu2 Se1 135.8(7) . 2_665 ? 
Se2 Cu2 Se1 165.7(15) 2_665 2_665 ? 
Se2 Cu2 Se1 91.6(2) . 2_665 ? 
Se2 Cu2 Se1 99.6(2) 3_565 2_665 ? 
Se1 Cu2 Se1 74.3(11) . 2_665 ? 
Cu1 Cu2 Se1 135.8(7) . 3_565 ? 
Se2 Cu2 Se1 91.6(2) 2_665 3_565 ? 
Se2 Cu2 Se1 99.6(2) . 3_565 ? 
Se2 Cu2 Se1 165.7(15) 3_565 3_565 ? 
Se1 Cu2 Se1 74.3(11) . 3_565 ? 
Se1 Cu2 Se1 74.3(11) 2_665 3_565 ? 
P1 Se1 Cu2 106.8(5) . . ? 
P1 Se1 Bi 98.78(9) . . ? 
Cu2 Se1 Bi 83.7(4) . . ? 
P2 Se2 Cu1 110.74(8) . . ? 
P2 Se2 Cu2 101.8(5) . . ? 
Cu1 Se2 Cu2 18.4(8) . . ? 
P2 Se2 Bi 100.58(11) . 1_565 ? 
Cu1 Se2 Bi 97.51(8) . 1_565 ? 
Cu2 Se2 Bi 83.5(7) . 1_565 ? 
Se1 Bi Se1 96.96(4) . 2 ? 
Se1 Bi Se1 96.96(4) . 3 ? 
Se1 Bi Se1 96.96(4) 2 3 ? 
Se1 Bi Se2 93.26(4) . 2_665 ? 
Se1 Bi Se2 91.12(4) 2 2_665 ? 
Se1 Bi Se2 166.10(4) 3 2_665 ? 
Se1 Bi Se2 166.09(4) . 3_455 ? 
Se1 Bi Se2 93.26(4) 2 3_455 ? 
Se1 Bi Se2 91.12(4) 3 3_455 ? 
Se2 Bi Se2 77.09(4) 2_665 3_455 ? 
Se1 Bi Se2 91.12(4) . 1_545 ? 
Se1 Bi Se2 166.10(4) 2 1_545 ? 
Se1 Bi Se2 93.26(4) 3 1_545 ? 
Se2 Bi Se2 77.09(4) 2_665 1_545 ? 
Se2 Bi Se2 77.09(4) 3_455 1_545 ? 
Se1 P1 Se1 113.22(12) . 3_665 ? 
Se1 P1 Se1 113.22(12) . 2_655 ? 
Se1 P1 Se1 113.22(12) 3_665 2_655 ? 
Se1 P1 P2 105.40(14) . 1_545 ? 
Se1 P1 P2 105.40(14) 3_665 1_545 ? 
Se1 P1 P2 105.40(14) 2_655 1_545 ? 
Se2 P2 Se2 110.50(13) 3_575 . ? 
Se2 P2 Se2 110.50(13) 3_575 2_775 ? 
Se2 P2 Se2 110.50(13) . 2_775 ? 
Se2 P2 P1 108.43(13) 3_575 1_565 ? 
Se2 P2 P1 108.43(13) . 1_565 ? 
Se2 P2 P1 108.43(13) 2_775 1_565 ? 
 
_diffrn_measured_fraction_theta_max    0.965 
_diffrn_reflns_theta_full              28.26 
_diffrn_measured_fraction_theta_full   0.965 
_refine_diff_density_max    4.152 
_refine_diff_density_min   -2.726 
_refine_diff_density_rms    0.506 
